# Supplementary material for: Reversible hydrogen storage in pristine and Li decorated 2D boron hydride
Source: Royal Society of Chemistry journal article supplement (doi:10.1039/c8cp05846f), 2018-01-01

## Supporting Information

### Reversible hydrogen storage in pristine and Li decorated 2D boron hydride

Long Chen<sup>a</sup>, Xianfei Chen<sup>a\*</sup>, Chao Duan<sup>a</sup>, Yi Huang<sup>b,c†</sup>, Qian Zhang<sup>a</sup>, Beibei Xiao<sup>d</sup>

<sup>a</sup> College of Materials and Chemistry & Chemical Engineering, Chengdu University of Technology, Chengdu 610059, China

<sup>b</sup> State Environmental Protection Key Laboratory of Synergetic Control and Joint Remediation for Soil & Water Pollution, Chengdu University of Technology, Chengdu 610059, China

<sup>c</sup> College of Environment and Ecology, Chengdu University of Technology, Chengdu 610059, China

<sup>d</sup> School of Energy and Power Engineering, Jiangsu University of Science and Technology, Zhenjiang 212003, China

---

\* Corresponding author. Email: [chenxianfei2014@cdut.edu.cn](mailto:chenxianfei2014@cdut.edu.cn);

† Corresponding author. Email: [huangyi@cdut.cn](mailto:huangyi@cdut.cn)

**Fig. S1** The most favorable atomic configuration of single H<sub>2</sub> adsorption on 2×3 BH,  $E_{\text{ad}}$  and  $h$  indicate the adsorption energy of H<sub>2</sub> molecule and the distance from H<sub>2</sub> molecule to BH layer.

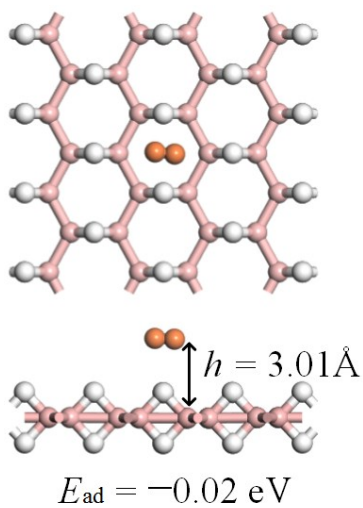

**Fig. S2** The atomic configuration of 2×3 (BH) with Na, K, Al, Ca and Mg doped on BH, respectively,  $h$  indicates the distance from the metal atom to the BH layer.

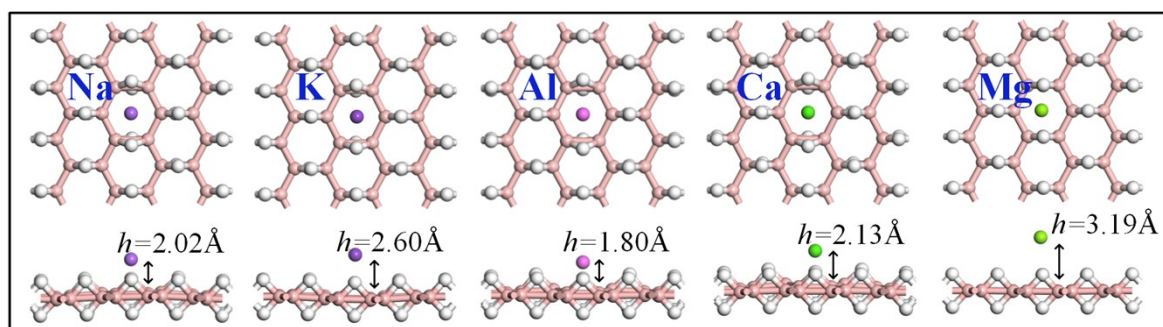

**Fig. S3** The optimized structures of Li-BH system with (a) one H<sub>2</sub>, (b) two H<sub>2</sub>, (c) three H<sub>2</sub> and (d) four H<sub>2</sub>. The  $l$  indicates the nearest distance of H<sub>2</sub> to the Li. The red balls refer to the adsorbed H<sub>2</sub> molecules for clarity.

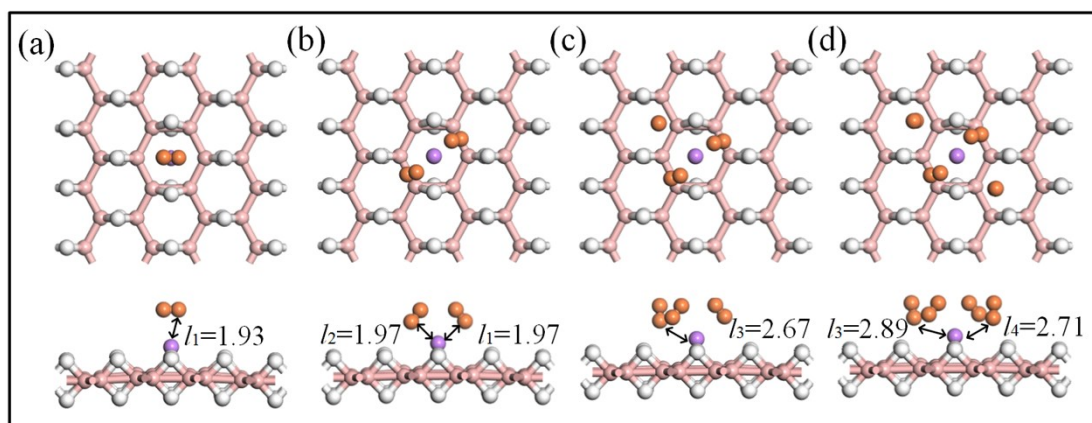

**Fig. S4** The most favorable atomic configurations of 4, 6 and 8 Li atoms adsorption on  $2 \times 2$  BH,  $E_b$  indicates the average binding energy of Li atom.

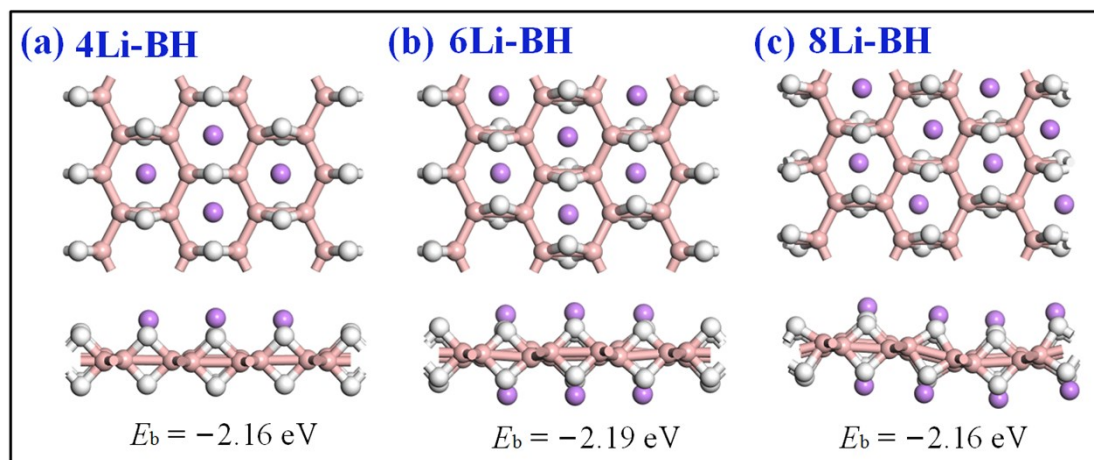

Supplement: c8cp05846f1.pdf [file c8cp05846f1.pdf]
